# Supplementary material for: Fluorescent proteins function as a prey attractant: experimental evidence from the hydromedusa Olindias formosus and other marine organisms
Source: PubMed Central journal article supplement (PMC4582119; doi:10.1242/bio.012138), 2015-07-31
Supplement: supp_bio.012138_BIO012138supp.pdf [file supp_bio.012138_BIO012138supp.pdf]

## Supplementary material Movie

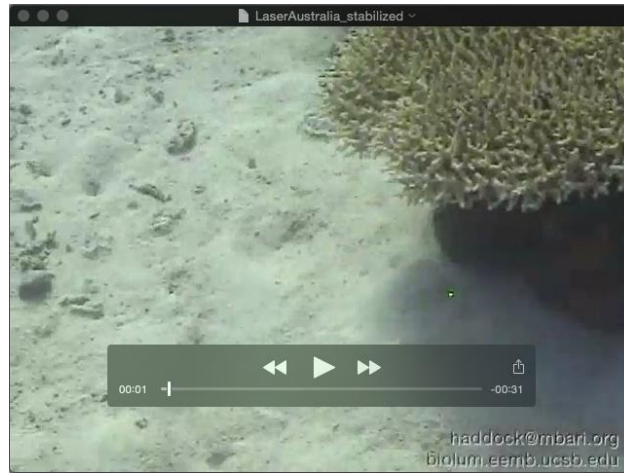

## Supplementary material data S1.

[Click here to Download data S1](#)

## Olindias Fluorescence attraction

Supplementary information file for: Haddock and Dunn. Fluorescent proteins function as a prey attractant: Experimental evidence from the hydromedusa *Olindias formosus* and other marine organisms.

Analysis of the effect of Light Color and Target type (Jellyfish with Fluorescent tentacles) on fish predation.

### Type I ANOVA

Two fixed (non-random) balanced factors mean that a type I ANOVA is appropriate. The only concerns are: \* if the sample sizes are big enough because there are difficulties with CI when  $n < 30$  \* whether parametric stats can be used with data distributed as they are.

### Histogram of attack numbers

```
ggplot(data=df,aes(x=Attacks)) + geom_histogram(aes(fill=Color),binwidth = 5) +
  facet_grid(Color~Jelly) +
  scale_fill_manual(values=c("lightblue","white","lightyellow")) +
  labs(title="Distribution of Attack freqs")
```

### Analysis of variance results from *Type I*

Fixed factor with equal replication

### Summary of Attack Results

Attacks on jelly with different trials

```
df_aov=aov(Attacks~Color*Jelly,data=df) # do the anova
summary(df_aov) # show table
```

```
##           Df Sum Sq Mean Sq F value    Pr(>F)
## Color      2  236.6   118.29   8.436 0.000343 ***
## Jelly      2  187.1    93.55   6.672 0.001695 **
## Color:Jelly  4  448.7   112.17   7.999 7.49e-06 ***
## Residuals 144 2019.2    14.02
## ---
## Signif. codes:  0 '***' 0.001 '**' 0.01 '*' 0.05 '.' 0.1 ' ' 1
```

```
print(model.tables(df_aov,"means"),digits=3) # show means and numbers

## Tables of means
## Grand mean
##
## 1.764706
##
## Color
## Color
##   Blue  White Yellow
##   3.49   0.61   1.20
##
## Jelly
## Jelly
## Blob None  Yes
## 0.57 1.49 3.24
##
## Color:Jelly
##           Jelly
## Color   Blob None Yes
##   Blue   0.88 1.24 8.35
##   White  0.41 1.18 0.24
##   Yellow 0.41 2.06 1.12
```

### Summary of Time Spent Results

Time spent in jelly half of tank (indicating interest)

```
df_aov.Fraction=aov(FractionTime~Color*Jelly,data=df) # do the anova
summary(df_aov.Fraction) # show table
```

```
##           Df Sum Sq Mean Sq F value Pr(>F)
## Color          2  0.042  0.02081   0.381 0.6837
## Jelly          2  0.066  0.03312   0.607 0.5465
## Color:Jelly    4  0.564  0.14110   2.585 0.0395 *
## Residuals    144  7.860  0.05459
## ---
## Signif. codes:  0 '***' 0.001 '**' 0.01 '*' 0.05 '.' 0.1 ' ' 1
```

### Calculate statistics per factor

Note confidence interval, etc not reliable when  $n < 30$

## Interactions for Attack number

```
Int.Attack = ddply(df,.(Color,Jelly),summarise,
                  M=mean(Attacks),SD=sd(Attacks),
                  SE=(sd(Attacks)/sqrt(length(Attacks)-1)),
                  N=length(Attacks))
```

```
conf_interval=.95
ciMult <- qt(conf_interval/2 + .5, Int.Attack$N-1)
Int.Attack$CI <- Int.Attack$SE * ciMult
```

Int.Attack

| ##   | Color  | Jelly | M         | SD        | SE        | N  | CI        |
|------|--------|-------|-----------|-----------|-----------|----|-----------|
| ## 1 | Blue   | Blob  | 0.8823529 | 1.1114379 | 0.2778595 | 17 | 0.5890358 |
| ## 2 | Blue   | None  | 1.2352941 | 1.6404806 | 0.4101201 | 17 | 0.8694159 |
| ## 3 | Blue   | Yes   | 8.3529412 | 9.5127623 | 2.3781906 | 17 | 5.0415388 |
| ## 4 | White  | Blob  | 0.4117647 | 0.8702603 | 0.2175651 | 17 | 0.4612173 |
| ## 5 | White  | None  | 1.1764706 | 2.0986690 | 0.5246673 | 17 | 1.1122449 |
| ## 6 | White  | Yes   | 0.2352941 | 0.5622957 | 0.1405739 | 17 | 0.2980034 |
| ## 7 | Yellow | Blob  | 0.4117647 | 0.7122871 | 0.1780718 | 17 | 0.3774953 |
| ## 8 | Yellow | None  | 2.0588235 | 3.9285905 | 0.9821476 | 17 | 2.0820600 |
| ## 9 | Yellow | Yes   | 1.1176471 | 3.2187411 | 0.8046853 | 17 | 1.7058566 |

## Plot interaction with standard error bars

```
ggplot(Int.Attack, aes(x=factor(Jelly), y=Attacks, colour = Color)) +
  geom_line(data = Int.Attack, aes(y = M, group = Color)) +
  geom_point(data=Int.Attack, aes(y=M, group=Color),size=3,color="black") +
  geom_linerange(data=Int.Attack, aes(y=M, ymax = M+SE, ymin = M-SE, group=Color), size=10,width = 5,alpha=0.3) +
  geom_errorbar(data=Int.Attack, aes(y=M, ymax = M+CI, ymin = M-CI, group=Color), width=.1)+
  scale_colour_manual(values=c("#00AACC","#888888","#CCCC00")) +
  theme_minimal() + labs(title="Attacks by factor with SE (bar) and 95% CI (whisker)")
```

## Execution of this manuscript

This manuscript can be recompiled from the source with the following bash commands:

```
Rscript -e "require(knitr); require(markdown); knit('S1_Olindias_Data_Markdown.Rmd')"
pandoc S1_Olindias_Data_Markdown.md -o S1_Olindias_Data_Markdown.pdf
```

This requires:

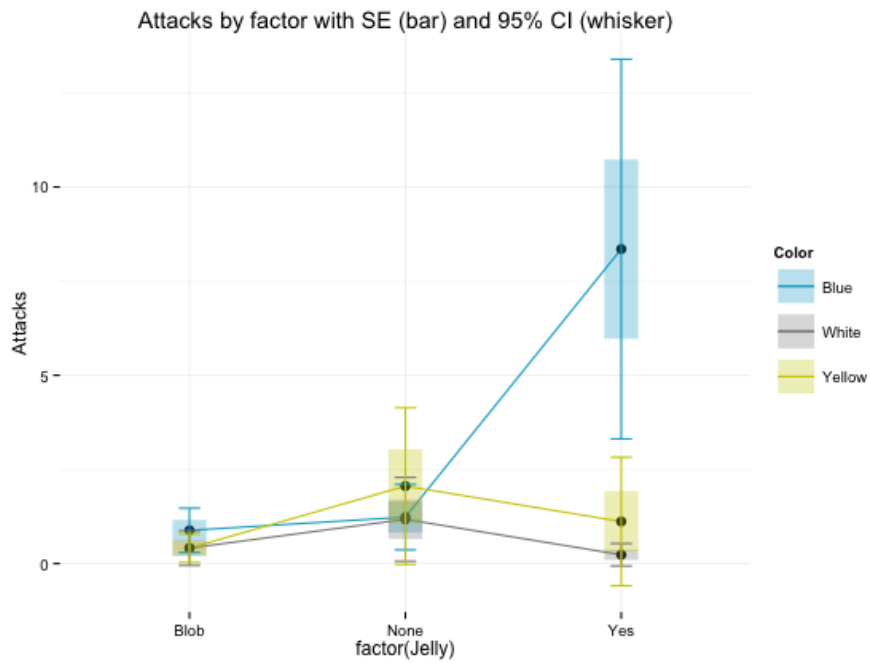

Figure 1: Box Plots of Number of Attacks

- R (<http://www.r-project.org>)
- The R libraries ggplot2, plyr, knitr
- pandoc (<http://pandoc.org>)

This manuscript was computed on Mon Jun 01 20:18:12 2015 with the following R package versions.

R version 3.1.2 (2014-10-31)

Platform: x86\_64-apple-darwin13.4.0 (64-bit)

locale:

[1] en\_US.UTF-8/en\_US.UTF-8/en\_US.UTF-8/C/en\_US.UTF-8/en\_US.UTF-8

attached base packages:

[1] stats graphics grDevices utils datasets methods base

other attached packages:

[1] plyr\_1.8.2 ggplot2\_1.0.1 knitr\_1.10.5

loaded via a namespace (and not attached):

[1] colorspace\_1.2-4 digest\_0.6.4 evaluate\_0.7 formatR\_1.0  
[5] grid\_3.1.2 gtable\_0.1.2 htmltools\_0.2.6 labeling\_0.3  
[9] MASS\_7.3-35 munsell\_0.4.2 proto\_0.3-10 Rcpp\_0.11.5  
[13] reshape2\_1.4.1 rmarkdown\_0.5.1 scales\_0.2.4 stringr\_0.6.2  
[17] tools\_3.1.2 yaml\_2.1.13
